# Supplementary material
Source: publisher figshare collection journal article supplement (https://acs.figshare.com/ndownloader/files/3879625)
Supplement: Supplementary file 1 [file 3879625]

# Inhibitory Act of Selenoprotein P on $\text{Cu}^+/\text{Cu}^{2+}$ -induced tau aggregation and neurotoxicity

Xiubo Du,<sup>a</sup> Youbiao Zheng,<sup>a</sup> Zhi Wang,<sup>b</sup> Yijing Chen,<sup>b</sup> Rui Zhou,<sup>a</sup> Guoli Song,<sup>a</sup> Jiazuan Ni<sup>b\*</sup> and Qiong Liu<sup>\* a</sup>

<sup>a</sup> Department of Marine Biology, Shenzhen Key Laboratory of Marine Biotechnology and Ecology, Shenzhen University, Shenzhen 518060, China. Tel: 86-755-26534152; E-mail: liuqiong@szu.edu.cn.

<sup>b</sup> College of Life Sciences, Shenzhen Key Laboratory of Microbial Genetic Engineering, Shenzhen University, Shenzhen 518060, China. Tel: 86-755-26536629. E-mail: jzni@szu.edu.cn.

## Estimation of $\text{Cu}^+$ Binding Constants of tau-R2

Bicinchoninic acid is a colorimetric  $\text{Cu}^+$  chelator, which can form a stable purple complex with  $\text{Cu}^+$  in a 2:1 ratio as  $\text{Cu}^+(\text{BCA})_2$  that exhibits absorption maxima at 562 nm ( $\epsilon = 7900 \text{ M}^{-1} \cdot \text{cm}^{-1}$ ) and 358 nm ( $\epsilon = 42\,900 \text{ M}^{-1} \cdot \text{cm}^{-1}$ ).<sup>1</sup> Therefore, the transfer of  $\text{Cu}^+$  from BCA to tau-R2 was evaluated by monitoring the changes in UV-Vis absorbance of  $\text{Cu}^+(\text{BCA})_2$  at 562 nm. At the wavelength between 450 nm and 650 nm, neither apo- nor copper-bound proteins gave any absorption, while UV absorption from BCA occurs at  $\lambda \leq 370 \text{ nm}$ .

Experiment of competition reaction between tau-R2 and BCA was carried out under anaerobic conditions as described previously.<sup>2</sup> Briefly,  $\text{Cu}^+$  solutions in the form of  $[\text{Cu}(\text{MeCN})_4]\text{PF}_6$  were mixed with BCA in a molar ratio of 1:3 in Tris/HCl buffer (50 mM, pH 7.4) as a stock solution. Protein solutions<sub>1</sub>

at various concentrations were then mixed with the stock solution to give rise to final concentrations of  $\text{Cu}^+$  of 20  $\mu\text{M}$  and BCA of 60  $\mu\text{M}$ . Ascorbic acid was kept at 1 mM to maintain the oxidation state of  $\text{Cu}^+$  in the reaction mixture. The results were corrected for dilution and base-line absorbance at 800 nm.

The absorbance data obtained in tau-R2 titrated into  $\text{Cu}^+(\text{BCA})_2$  (Fig. 1) were used to calculate the binding constants for  $\text{Cu}^+$ -tau-R2 complex, using the following equation,

$$\frac{1}{Y} = \frac{1}{n} + \frac{1}{nK_a} \cdot X \quad (\text{Eq.1})$$

where the fractional saturation  $Y = (\text{concentration of } \text{Cu}^+ \text{ bound to P}) / (\text{total concentration of all forms of P})$ ,  $X = \frac{[\text{BCA}]^2}{[\text{Cu}^+(\text{BCA})_2]}$ ,  $K_a$  is the intrinsic binding constant,  $n$  is the stoichiometry value. The detailed in-

formation for the calculation of  $K_a$  and  $n$  value could be found in Table S1. The slope of the plot of  $1/Y$  versus  $X$  (Fig. S1) gives  $\log K_a = 1.9 \times 10^{-5}$  (correlation coefficient  $r = 0.94$ ,  $n = 0.34$ , Fig. 1, Fig. S1 and Table S1). Using the known value for the association constant of  $\text{Cu}(\text{BCA})_2$  of  $\log \beta_2 = 17.30$ , binding constants of  $K_{\text{tau-R2}} = 12.58$  was calculated for  $\text{Cu}^+$  binding to tau-R2.

## Reference

1. Xiao, Z.; Donnelly, P. S.; Zimmermann, M.; Wedd, A. G. Transfer of copper between bis(thiosemicarbazone) ligands and intracellular copper-binding proteins. insights into mechanisms of copper uptake and hypoxia selectivity. *Inorg. Chem.* **2008**, 47, 4338-47.
2. Yatsunyk, L. A. and Rosenzweig, A. C. Cu(I) binding and transfer by the N terminus of the Wilson disease protein. *J Biol Chem*, **2007**, 282, 8622-8631.

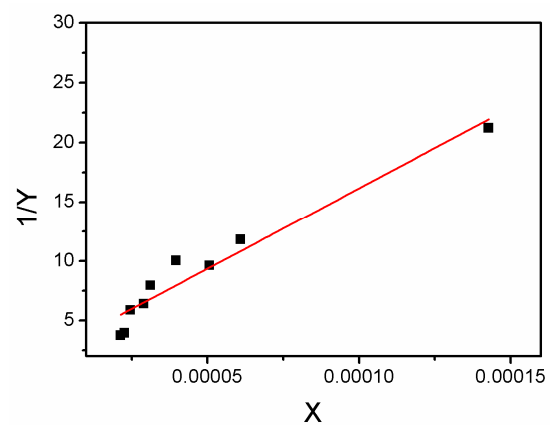

**Figure S1** Plot of 1/Y versus of X to give the intrinsic binding constants and binding number of tau-R2

for  $\text{Cu}^+$ .  $X = \frac{[\text{BCA}]^2}{[\text{Cu}^+(\text{BCA})_2]}$        $Y = \frac{[n\text{Cu}^+ - P]}{[P]_r}$

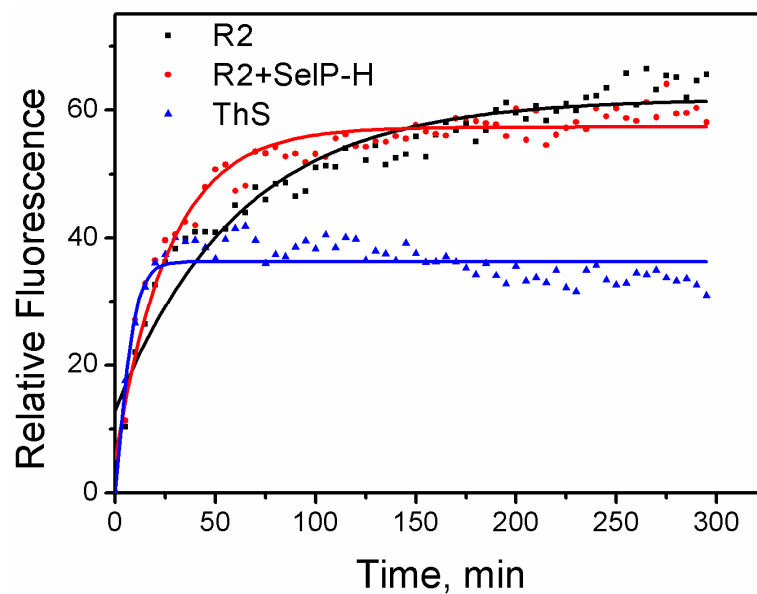

**Figure S2.** Fibrillation of tau-R2 in the absence of copper ions. Tau-R2 (15  $\mu\text{M}$ ) was incubated with heparin (3.8  $\mu\text{M}$ ) in the presence or absence of SeIP-H (10  $\mu\text{M}$ ). All experiments were carried out in 50 mM Tris-HCl, 100 mM NaCl, containing 20  $\mu\text{M}$  ThS at pH 7.4, 37  $^{\circ}\text{C}$ .  $\lambda_{\text{ex}}=440$  nm,  $\lambda_{\text{em}}=480$  nm. Solid lines represent the fits of the data to Boltzmann equation.

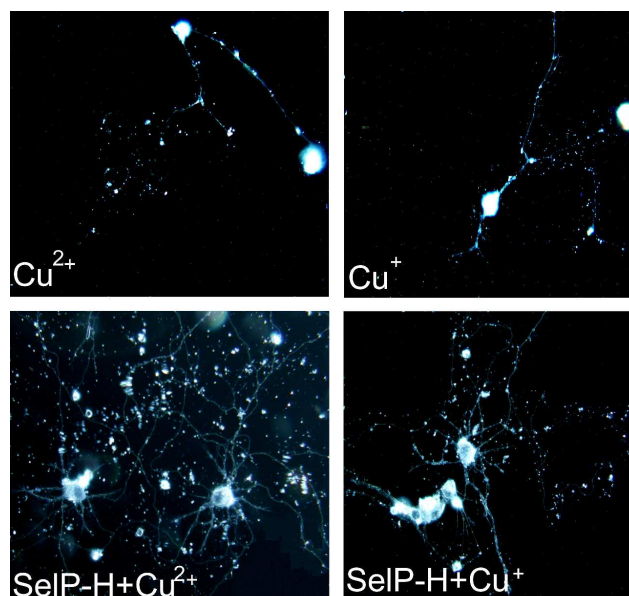

**Figure S3.** Typical dark field microscopy (DFM) images of primary neurons upon 12 h treatment with copper ions (3.5  $\mu$ M) in the presence or absence of SelP-H (5  $\mu$ M).  $\text{Cu}^+$  was prepared by reducing  $\text{CuSO}_4$  with 1 mM  $\text{H}_2\text{Asc}$ .

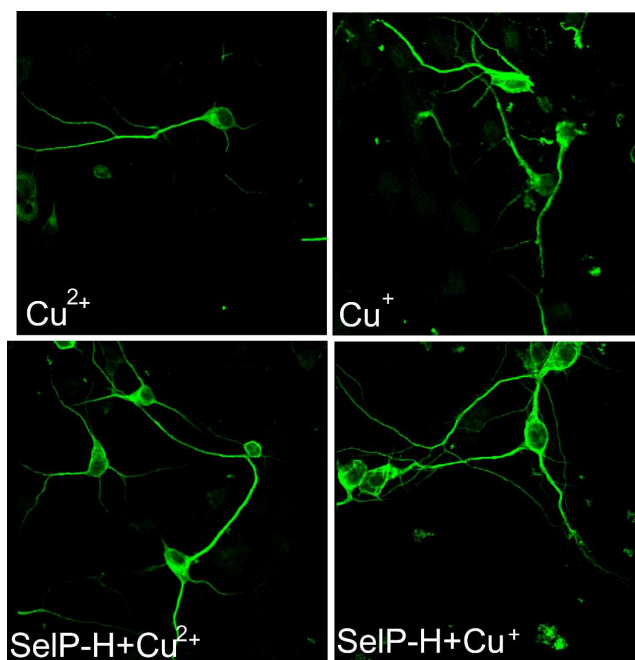

**Figure S4.** Typical confocal images showing the level and distribution of MAP-2 in primary neurons upon 12 h treatment with copper ions ( $3.5 \mu\text{M}$ ) in the presence or absence of SelP-H ( $5 \mu\text{M}$ ).  $\text{Cu}^{+}$  was prepared by reducing  $\text{CuSO}_4$  with  $1 \text{ mM H}_2\text{Asc}$ .

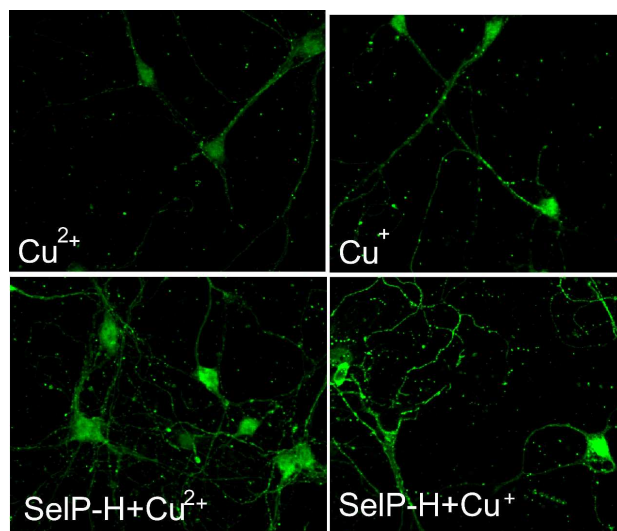

**Figure S5.** Typical confocal images showing the level and distribution of synaptophysin in primary neurons upon 12 h treatment with copper ions ( $3.5 \mu\text{M}$ ) in the presence or absence of SelP-H ( $5 \mu\text{M}$ ).  $\text{Cu}^{+}$  was prepared by reducing  $\text{CuSO}_4$  with  $1 \text{ mM H}_2\text{Asc}$ .

**Table S1** Determination of intrinsic binding constants and binding number of tau-R2 for Cu<sup>+</sup> by competition with BCA for Cu<sup>+</sup>,<sup>a, b</sup>

| [P] <sub>T</sub> , μM                     | 0       | 1        | 2        | 5        | 10      | 15       | 30       | 40       | 50       | 60       | 200      |
|-------------------------------------------|---------|----------|----------|----------|---------|----------|----------|----------|----------|----------|----------|
| Absorbance                                | 0.2144  | 0.2116   | 0.2090   | 0.2053   | 0.1977  | 0.1942   | 0.1824   | 0.1698   | 0.1600   | 0.1512   | 0.0738   |
| [Cu <sup>+</sup> -2BCA], μM               | 20      | 19.7332  | 19.4926  | 19.1494  | 18.4387 | 18.1104  | 17.0118  | 15.8403  | 14.9245  | 14.1056  | 6.8793   |
| [BCA] <sub>0</sub> , μM                   | 20      | 20.5335  | 21.0147  | 21.7012  | 23.1226 | 23.7792  | 25.9765  | 28.3193  | 30.1511  | 31.7889  | 46.2414  |
| [Cu] <sub>0</sub> × 10 <sup>-11</sup> , M | 0.025   | 0.0234   | 0.0221   | 0.0203   | 0.0172  | 0.0160   | 0.0126   | 0.0099   | 0.0083   | 0.0070   | 0.0016   |
| [nCu <sup>+</sup> -P], μM                 | 0       | 0.2667   | 0.5074   | 0.8506   | 1.5613  | 1.8896   | 2.9882   | 4.1597   | 5.0755   | 5.8944   | 13.1207  |
| X                                         | 0.00002 | 2.14E-05 | 2.27E-05 | 2.46E-05 | 2.9E-05 | 3.12E-05 | 3.97E-05 | 5.06E-05 | 6.09E-05 | 7.16E-05 | 0.000311 |
| 1/Y                                       | n.d.    | 3.7490   | 3.9419   | 5.8783   | 6.4050  | 7.9383   | 10.0393  | 9.6161   | 9.8512   | 10.1791  | 15.2431  |
| n                                         |         |          |          |          |         |          | 0.34     |          |          |          |          |
| K <sub>a</sub>                            |         |          |          |          |         |          | 1.9E-5   |          |          |          |          |
| r                                         |         |          |          |          |         |          | 0.9432   |          |          |          |          |

*n.d.: not determined*

<sup>a</sup> Experiments were performed in Tris-HCl (50 mM, pH 7.4) and H<sub>2</sub>Asc (1 mM) under anaerobic conditions.

<sup>b</sup> Total Cu<sup>+</sup> and BCA concentration in all equilibrium solutions are 20 and 60 μM, respectively.

$$X = \frac{[BCA]^2}{[Cu^+(BCA)_2]}$$

$$Y = \frac{[nCu^+ - P]}{[P]_T}$$
